# Supplementary material for: Confined antiskyrmion motion driven by electric current excitations
Source: PubMed Central journal article supplement — Nat Commun. 2024 Sep 4;15:7701. doi: 10.1038/s41467-024-52072-4 (PMC11371833; doi:10.1038/s41467-024-52072-4), 2024-09-04
Supplement: 41467_2024_52072_MOESM2_ESM.pdf [file 41467_2024_52072_MOESM2_ESM.pdf]

### **Supplementary Movie 1**

Current-driven motion of an elongated antiskyrmion ( $n = 4$ ) under 90 ns pulse excitations, with current flowing parallel to the horizontal stripes at  $j = 0.78 \times 10^{11} \text{ A}\cdot\text{m}^{-2}$  and 0 mT external field.

### **Supplementary Movie 2**

Current-driven motion of an elongated antiskyrmion ( $n = 4$ ) under 90 ns pulse excitations, with current flowing perpendicular to the vertical stripes at  $j = -0.59 \times 10^{11} \text{ A}\cdot\text{m}^{-2}$  and 0 mT external field.

### **Supplementary Movie 3**

Current-driven motion of an elongated antiskyrmion ( $n = 4$ ) under 110 ns pulse excitations, with current flowing parallel to the horizontal stripes at  $j = 0.78 \times 10^{11} \text{ A}\cdot\text{m}^{-2}$  and 0 mT external field.

### **Supplementary Movie 4**

Current-driven motion of an elongated antiskyrmion ( $n = 4$ ) under 150 ns pulse excitations, with current flowing perpendicular to the vertical stripes at  $j = -0.59 \times 10^{11} \text{ A}\cdot\text{m}^{-2}$  and 0 mT external field.
